# Supplementary material
Source: publisher figshare collection journal article supplement (https://frontiersin.figshare.com/ndownloader/files/12713597)
Supplement: Supplementary file [file 12713597]

(A)

amiR-*SlBOP1-3* (*At miR-164b* backbone)

CTCGAGGAGAATGATGAAGGTGTGTGATGAGCAAGATCTAGCGGCTGAGAGTGTATtTTACTAGCTC  
ATATATACACTCTCACCACAAATGCGTGTATATATGCGGAATTTTGTGATATAGATGTGTGTGTGTG  
TTGAGTGTGATGATATGGATGAGTTAGTTCaTTACACTCTCttCCGCaAGATCATGACCACTCCACC  
TTGGTGACGATGACGACGAGGGTTCAAGTGTACGCACGTGGGAATATACTTATATCGATAAACACA  
CACGTGCGGGATCC

|       |      |           |            |      |      |      |     |      |        |       |        |   |
|-------|------|-----------|------------|------|------|------|-----|------|--------|-------|--------|---|
| 10    | 20   | 30        | 40         | 50   | 60   | 70   |     |      |        |       |        |   |
|       | A    | CU        | UUUU       | A    | ---- | U    | - - | A    | G      | A     | A      |   |
| GAUCU | GCGG | GAGAGUGUA | ACUAGCUCAU | UAUA | CAC  | CUCA | C   | CACA | AUGCGU | UAUAU | UGC GG | A |
| CUAGA | CGCC | CUCUCACAU | UGAUUGAGUA | GUAU | GUG  | GAGU | G   | GUGU | UGUGUA | AUAUA | GUGUU  | U |
| ^     | A    | UU        | UACU       | G    | AGUA | U    | U   | U    | G      | G     | -      | U |
| 150   | 140  | 130       | 120        | 110  | 100  | 90   | 80  |      |        |       |        |   |

(B)

*Solyc04g040220/SlBOP1* 5' GAUACACUCUCAGCCGCUAGA 3'  
*Solyc10g079460/SlBOP2* 5' GAUACACUCUCAGCCGCUAGA 3'  
*Solyc10g079750/SlBOP3* 5' GAUACACUCUCAGCCGCUAGA 3'  
*amiR-SlBOP1-3* 3' UUAUGUGAGAGUCGGCGAUCU 5'

Supplementary Figure 1: (A) The pre-amiR-*Sl BOP1-3* sequence and predicted fold-back structure in the Arabidopsis (*At*) *miR-164b* backbone with the *amiR-SlBOP1-3* sequence highlighted in red. (B) An alignment of the *amiR-SlBOP1-3* sequence with the RNA target sequences of the *SlBOP1-3* genes. G-U wobbles between the *amiR-SlBOP1-3* and the target sequences are marked in blue.
